# Supplementary material for: A novel NLR immune receptor from Aegilops tauschii confers resistance to wheat eyespot disease
Source: Research Square preprint supplement (doi:10.21203/rs.3.rs-8021535/v1), 2026-01-02
Supplement: Supplementary file 1 [file cea7618a7fb402b42654d8c3.xlsx]

## Sheet: Index
Supplementary Table	Description
1	Supplementary Table 1: Designated and cloned R genes from Ae. tauschii
2	Supplementary Table 2: O. yallundae L2 panel phenotyping isolate Y20/848
3	Supplementary Table 3: Chromosome 1D peak underlying annotated genes within LD on TA1675 reference assembly
4	Supplementary Table 4: Pch4 and Aet.TA1675.r1.1D001100 presence across Ae. tauschii L2
5	Supplementary Table 5: Aegilops tauschii accession code and phenotype conversions from Yildirim et al 1995
6	Supplementary Table 6: O. yallundae L1 panel phenotyping isolate Y16/847
7	Supplementary Table7: Synthetic hexaploid wheat accessions and predicted Pch4 presence
8	Supplementary Table 8: Synthetic hexaploid wheat phenotyping
9	Supplementary Table 9. Post-hoc pairwise comparisons using Wilcoxon rank-sum tests with Benjamini-Hochberg correction for Figure 3b
10	Supplementary Table 10: Primers used in this study (overhangs in red, single base changes in green, start/stop codons in blue.
11	Supplementary Table 11: BW_01185 x BW_01086 F2 genotype x phenotype plate layout and phenotypes
12	Supplementry Table 12: SHWBC line phenotypes
13	Supplementary Table 13: Phenotyping of T. aestivum transgenic lines with Oculimacula acuformis
14	Supplementary table 14: Germplasm used in this study
15	Supplementary Table 15: Oculimacula spp. isolates used in this study
16	Supplementary Table 16: McScanX Pch4 and Pm3 microsynteny block
17	Supplementary Table 17: Resistance gene prediction within Ae. tauschii L2 accessions

## Sheet: T1
Supplementary Table 1: Designated and cloned R genes from Ae. tauschii
Disease	Gene	Chromosome	Identified in	Cloned	Gene classification	Reference
Stripe rust	YrAS2388R / Yr28	4DS	Aet	Yes	NLR	doi.org/10.1038/s41467-019-11872-9
	Lr1	5DL	Wheat	Yes	NLR	doi.org/10.1007/s11103-007-9201-8
Leaf Rust	Lr21	1DS	SHW/Aet	Yes	NLR	doi.org/10.1093/genetics/164.2.655
	Lr22a	2DS	SHW	Yes	NLR	doi.org/10.1038/nbt.3877
	Lr32	3DS	SHW	No	N/A	doi.org/10.2135/cropsci1987.0011183X002700020013x
	Lr39	2DS	SHW	Yes	WTK	doi.org/10.1038/s41586-024-07808-z
	Lr42	1DS	Aet	Yes	NLR	doi.org/10.1038/s41467-022-30784-9
Stem rust	Sr33	1DS	SHW	Yes	NLR	doi: 10.1126/science.1239028
	Sr45	1DS	SHW	Yes	NLR	doi.org/10.1038/nbt.3543
	Sr46	2DS	Aet	Yes	NLR	doi.org/10.1038/s41587-018-0007-9
	SrTA1662 (Sr66)	1DS	Aet	Yes	NLR	doi.org/10.1038/s41587-018-0007-9
Powdery mildew	Pm2	5DS	Wheat	Yes	NLR	doi.org/10.1186/s13059-016-1082-1
	Pm19	7D	SHW	No	N/A	doi.org/10.1038/hdy.1995.22
	Pm34	5DL	SHW	No	N/A	doi.org/10.1007/s00122-006-0397-9
	Pm35	5DL	SHW	No	N/A	doi.org/10.1007/s00122-007-0530-4
	Pm58	2DS	Aet	No	N/A	doi.org/10.1007/s00122-017-2874-8
	WTK4	7DS	Aet	Yes	WTK	doi.org/10.1038/s41587-021-01058-4
	PmKu-2013	5DS	Aet	No	N/A	doi.org/10.3390/agronomy14040744
Septoria	Stb5	7DS	SHW	No	N/A	doi.org/10.1007/s001220100668
	Stb16q	3D	SHW	Yes	RLK	doi.org/10.1038/s41467-020-20685-0
Brown spot	Tsr3	3D	SHW	No	N/A	doi.org/10.1007/s00122-006-0484-y
Blast	Rwt3	1D	Wheat/Aet	Yes	NLR	doi.org/10.1038/s41477-023-01357-5
	Rwt4	1D	Wheat/Aet	Yes	WTK	doi.org/10.1038/s41477-023-01357-5
	Rmg10	2DS	Aet/SHW	No	N/A	doi.org/10.1094/PHYTO-01-24-0018-R
Wheat curl mite	Cmc4	6DS	Aet	Yes	NLR	doi.org/10.1038/s41587-021-01058-4

## Sheet: T2
Supplementary Table 2: O. yallundae L2 panel phenotyping isolate Y20/848
	Technical rep 1				Technical rep 2				Technical rep 3
Accession	plant 1	plant2	plant 2	plant 4	plant 1	plant2	plant 2	plant 4	plant 1	plant2	plant 2	plant 4
Hoh-501	9	9	9	9	9	9	9	N/A	9	9	9	9
Hoh-506	9	9	9	9	9	9	8	9	9	9	9	9
Battalion	4	5	5	5	6	7	7	6	7	7	8	7
Cappelle desprez	8	9	8	9	9	9	9	9	9	9	9	9
Holdfast	9	9	9	9	9	9	9	9	9	9	9	9
Picaso	9	4	3	4	5	5	5	5	9	6	6	5
Rendezvous	6	9	9	6	8	7	7	9	9	9	8	8
Robigus	9	9	7	8	9	8	8	9	9	9	9	9
Skyfall	5	6	4	4	5	5	5	6	4	5	6	6
BW_01001	9	9	9	9	9	9	9	9	9	9	9	9
BW_01002	9	9	9	9	9	9	9	9	9	9	9	9
BW_01003	9	7	9	9	9	9	9	7	9	9	9	9
BW_01004	3	3	7	3	7	5	4	5	9	5	5	5
BW_01005	9	9	9	N/A	9	9	9	9	9	9	9	9
BW_01006	9	9	9	9	9	9	9	9	9	9	9	9
BW_01007	7	3	7	9	9	9	6	6	9	9	9	9
BW_01008	9	9	9	9	9	9	9	9	9	9	9	9
BW_01009	3	3	3	3	9	9	9	9	6	7	9	9
BW_01010	9	9	8	8	9	9	9	N/A	9	9	7	6
BW_01011	9	9	9	9	9	9	9	9	9	9	9	9
BW_01012	9	9	9	9	9	9	9	9	9	9	9	9
BW_01015	5	5	3	4	5	4	5	4	6	5	4	4
BW_01016	1	1	3	3	5	5	4	5	7	5	5	4
BW_01019	9	9	9	9	9	9	8	N/A	9	9	9	6
BW_01020	1	3	2	N/A	9	9	9	5	9	6	5	N/A
BW_01021	2	2	2	3	6	6	7	8	5	5	6	7
BW_01022	8	9	9	9	9	9	9	9	7	9	9	9
BW_01024	4	4	3	4	5	4	5	6	5	5	4	4
BW_01025	2	2	1	1	5	7	5	7	4	5	5	5
BW_01026	2	1	2	3	4	4	4	4	4	4	4	5
BW_01027	9	9	9	9	8	8	8	8	9	9	9	9
BW_01030	9	9	9	9	9	9	9	9	9	9	9	9
BW_01031	3	3	2	3	3	3	4	5	4	5	5	5
BW_01032	9	9	9	9	9	8	9	9	9	9	9	9
BW_01033	9	9	9	9	9	9	9	9	9	9	9	N/A
BW_01039	2	2	3	2	3	2	3	2	3	4	3	4
BW_01041	9	9	9	9	9	9	9	9	9	9	9	9
BW_01042	9	9	9	9	9	9	9	9	9	9	9	9
BW_01043	9	2	N/A	N/A	9	9	9	N/A	9	9	9	9
BW_01044	9	9	9	9	9	9	9	9	9	9	9	9
BW_01045	9	9	8	8	9	8	8	8	9	9	9	9
BW_01046	3	4	4	5	6	7	6	9	9	9	9	7
BW_01047	9	9	9	9	9	9	9	9	9	9	9	9
BW_01048	5	4	4	7	5	6	7	7	4	4	4	4
BW_01049	1	2	0	2	6	4	4	5	4	4	4	4
BW_01050	9	9	9	9	9	9	9	9	9	9	9	9
BW_01055	9	9	9	9	9	9	9	9	9	9	9	9
BW_01056	5	5	4	4	9	9	7	7	7	7	7	7
BW_01057	8	8	9	9	6	8	7	8	9	8	8	6
BW_01058	9	9	9	9	9	9	9	N/A	9	9	9	9
BW_01059	9	9	9	9	9	9	9	9	9	9	9	9
BW_01060	8	7	9	7	9	9	9	9	8	9	9	9
BW_01062	9	9	9	9	9	9	9	9	9	9	9	9
BW_01063	9	9	9	9	9	9	9	9	9	9	9	9
BW_01065	7	9	9	9	9	9	8	8	9	9	9	6
BW_01066	3	3	2	3	6	5	5	5	6	5	5	5
BW_01068	9	7	9	9	9	9	8	6	9	9	9	6
BW_01069	9	7	7	5	9	8	7	9	5	5	4	9
BW_01070	9	9	9	9	9	9	9	9	9	9	9	9
BW_01071	9	9	9	9	9	9	9	9	9	9	9	9
BW_01072	9	9	9	9	9	9	6	6	9	9	9	8
BW_01073	9	9	9	9	9	9	9	9	9	9	9	9
BW_01074	9	9	9	9	9	9	9	9	9	9	9	9
BW_01076	9	9	7	7	6	9	N/A	N/A	9	9	6	N/A
BW_01077	3	3	3	6	9	9	8	5	5	6	8	9
BW_01078	9	9	4	4	8	8	8	9	9	9	8	9
BW_01079	9	9	9	9	9	9	9	9	9	9	9	9
BW_01081	9	9	9	9	9	9	9	9	9	9	9	9
BW_01082	9	9	9	3	9	9	9	9	9	8	9	9
BW_01083	9	9	9	9	9	9	9	9	9	9	9	9
BW_01084	9	9	9	9	9	9	6	N/A	6	N/A	N/A	N/A
BW_01085	6	7	7	9	5	6	5	6	5	5	6	5
BW_01086	9	9	9	9	9	9	9	9	9	9	9	9
BW_01087	9	9	9	9	9	9	9	7	9	9	9	9
BW_01088	4	4	8	N/A	4	4	5	5	7	6	6	6
BW_01089	3	3	3	3	5	6	5	5	5	5	5	5
BW_01091	3	4	3	4	6	6	5	5	3	3	4	4
BW_01094	9	7	5	7	4	4	5	5	4	4	3	4
BW_01095	5	5	5	7	5	5	6	6	5	4	4	4
BW_01096	9	9	9	7	9	9	9	9	9	9	9	9
BW_01097	9	9	9	9	9	9	9	9	9	9	9	9
BW_01098	9	9	9	9	9	9	9	9	9	9	9	9
BW_01099	8	9	9	9	9	9	9	9	9	9	9	9
BW_01100	9	9	9	9	9	9	9	9	9	9	9	9
BW_01102	9	5	5	6	8	7	7	7	5	4	5	5
BW_01103	9	9	9	9	9	N/A	N/A	N/A	9	9	9	9
BW_01104	3	4	3	4	3	3	4	3	4	5	4	6
BW_01105	9	9	9	9	8	8	9	7	9	9	8	9
BW_01106	5	4	5	6	6	6	5	5	5	5	4	4
BW_01107	9	9	9	9	9	9	9	9	8	9	9	9
BW_01108	7	5	4	5	4	4	4	4	9	9	8	6
BW_01109	5	4	5	5	5	5	5	6	6	5	5	5
BW_01111	9	9	9	9	6	7	9	9	9	9	7	7
BW_01112	9	9	9	9	9	9	9	9	9	9	9	9
BW_01113	9	9	8	8	9	9	9	9	9	9	9	9
BW_01114	9	7	3	9	9	9	9	9	9	9	9	9
BW_01115	5	4	3	3	6	6	6	5	7	5	5	5
BW_01116	9	9	9	9	9	9	9	9	9	9	9	9
BW_01117	5	4	3	4	5	5	6	6	6	5	5	4
BW_01118	5	4	4	4	4	5	5	5	4	3	4	4
BW_01119	7	7	7	7	6	7	7	9	9	8	6	6
BW_01120	7	8	8	7	5	5	5	8	6	5	4	5
BW_01121	8	8	9	9	8	9	9	9	8	8	9	9
BW_01122	9	9	9	5	9	9	9	9	9	6	9	9
BW_01123	9	9	9	9	9	9	9	8	9	9	9	7
BW_01124	9	8	8	7	7	7	9	9	9	9	9	9
BW_01125	9	9	9	6	9	9	9	9	9	9	9	9
BW_01126	9	9	9	9	9	9	9	9	9	9	9	9
BW_01128	6	4	4	4	5	5	6	6	5	6	5	6
BW_01129	9	9	9	9	9	9	9	9	9	9	9	9
BW_01130	9	9	9	9	9	9	9	9	9	9	9	9
BW_01132	9	9	9	9	9	9	9	9	7	9	9	N/A
BW_01133	9	9	9	9	9	9	9	9	9	9	9	9
BW_01134	5	4	4	5	5	5	6	9	7	9	9	9
BW_01135	9	9	9	9	9	9	9	9	9	9	9	9
BW_01136	9	9	9	9	5	9	9	9	9	9	9	9
BW_01137	9	9	9	9	9	9	9	9	9	9	9	9
BW_01138	8	9	9	9	9	9	5	N/A	8	7	9	9
BW_01139	9	9	9	9	8	9	9	9	9	9	9	9
BW_01140	7	7	6	5	5	6	6	5	5	4	5	4
BW_01141	5	5	4	9	5	5	6	7	7	7	6	6
BW_01142	9	9	9	9	9	9	9	9	9	9	9	9
BW_01143	9	9	9	9	9	9	9	9	9	9	9	9
BW_01144	9	9	9	9	9	9	9	9	5	9	9	9
BW_01146	5	5	5	6	4	5	5	5	6	4	4	5
BW_01147	4	4	5	4	4	4	4	4	4	5	4	4
BW_01148	5	4	5	6	4	5	5	4	6	5	6	7
BW_01151	9	9	9	9	6	7	9	9	9	9	9	9
BW_01152	9	9	9	9	9	9	9	9	9	9	9	9
BW_01153	9	9	9	9	9	9	9	9	9	9	9	9
BW_01154	9	9	9	9	9	9	9	9	9	9	9	9
BW_01155	9	9	9	9	8	9	9	9	9	9	9	9
BW_01156	9	8	9	9	9	9	9	9	9	9	8	9
BW_01158	9	9	9	9	9	9	9	9	9	9	9	9
BW_01159	9	9	9	9	9	9	9	9	9	9	9	9
BW_01161	9	9	N/A	N/A	4	9	9	9	9	9	9	9
BW_01162	9	9	9	9	9	9	9	9	9	9	9	9
BW_01163	9	9	9	9	9	9	9	N/A	9	9	9	9
BW_01164	3	4	3	3	5	5	5	6	4	4	5	5
BW_01165	9	9	7	8	9	9	9	9	9	9	9	9
BW_01166	8	8	7	7	9	9	9	7	7	9	8	9
BW_01167	9	9	9	9	9	9	9	9	9	9	9	9
BW_01168	9	9	9	9	9	9	9	9	9	9	9	9
BW_01170	7	7	6	7	8	6	6	6	9	9	8	8
BW_01171	9	9	9	9	9	9	9	9	9	9	9	9
BW_01172	9	9	9	9	9	9	9	9	9	9	9	7
BW_01175	9	9	9	9	9	9	9	9	9	9	9	9
BW_01176	9	9	9	9	9	9	9	9	9	9	9	9
BW_01177	6	6	8	7	9	9	9	9	9	9	9	9
BW_01178	8	6	7	7	9	9	9	9	9	9	9	9
BW_01179	9	9	9	9	9	6	7	9	5	9	9	9
BW_01181	6	6	4	4	3	4	5	5	4	4	4	5
BW_01182	5	4	6	4	4	4	5	6	4	5	3	3
BW_01184	9	9	9	9	9	9	9	9	9	9	9	9
BW_01185	7	5	5	5	6	5	7	8	4	4	4	4
BW_01186	9	9	9	9	9	9	9	9	5	4	4	6
BW_01189	9	9	9	9	9	9	9	9	9	9	9	9
BW_01190	9	9	9	9	9	6	N/A	N/A	9	9	9	9
BW_01192	9	4	N/A	N/A	9	9	9	9	9	9	9	9
BW_26041	5	4	5	4	4	4	4	4	7	7	6	6

## Sheet: T3
Supplementary Table 3: Chromosome 1D peak underlying annotated genes within LD on TA1675 reference assembly
Gene name	Location	Annotation by InterPro
Aet.TA1675.r1.1D001010	Aet_TA1675_1D:6,245,874..6,247,939 (-)	FA hydroxylase
Aet.TA1675.r1.1D001020	Aet_TA1675_1D:6,251,878..6,253,866 (-)	CzcO superfamily protein
Aet.TA1675.r1.1D001030	Aet_TA1675_1D:6,276,688..6,279,858 (+)	Cytochrome P450
Aet.TA1675.r1.1D001040	Aet_TA1675_1D:6,360,542..6,361,486 (-)	Dirigent-like protein
Aet.TA1675.r1.1D001050	Aet_TA1675_1D:6,718,555..6,719,858 (+)	LTR retrotransposon
Aet.TA1675.r1.1D001060	Aet_TA1675_1D:6,791,502..6,795,603 (+)	Type 1 glutamine amidotransferase
Aet.TA1675.r1.1D001070	Aet_TA1675_1D:6,798,491..6,802,146 (+)	ANKYR repeat
Aet.TA1675.r1.1D001080	Aet_TA1675_1D:6,806,055..6,806,603 (+)	n/a
Aet.TA1675.r1.1D001090	Aet_TA1675_1D:6,807,756..6,812,273 (-)	CC-NLR
Aet.TA1675.r1.1D001100	Aet_TA1675_1D:6,871,501..6,875,907 (-)	CC-NLR
Aet.TA1675.r1.1D001110	Aet_TA1675_1D:6,883,663..6,883,887 (+)	n/a
Aet.TA1675.r1.1D001120	Aet_TA1675_1D:6,900,157..6,900,786 (+)	DDRGK domain containing protein

## Sheet: T4
Supplementary Table 4: Aet.TA1675.r1.1D001090 and Aet.TA1675.r1.1D001100 presence across Ae. tauschii L2
Accession	Aet.TA1675.r1.1D001090 (Pch4)	Aet.TA1675.r1.1D001100
BW_01001	0	0
BW_01002	0	0
BW_01003	0	0
BW_01004	1	1
BW_01005	0	1
BW_01006	0	0
BW_01007	0	0
BW_01008	0	0
BW_01009	0	0
BW_01010	0	0
BW_01011	0	0
BW_01012	0	0
BW_01015	0	0
BW_01016	1	0
BW_01019	0	0
BW_01020	0	0
BW_01021	1	0
BW_01022	0	0
BW_01024	1	0
BW_01025	0	0
BW_01026	1	1
BW_01027	0	0
BW_01030	0	0
BW_01031	1	0
BW_01032	0	0
BW_01033	0	0
BW_01039	1	0
BW_01041	0	0
BW_01042	0	0
BW_01043	0	0
BW_01044	0	0
BW_01045	0	1
BW_01046	0	1
BW_01047	0	0
BW_01048	1	1
BW_01049	1	0
BW_01050	0	0
BW_01055	0	0
BW_01056	1	1
BW_01057	1	1
BW_01058	0	0
BW_01059	0	0
BW_01060	0	0
BW_01062	0	0
BW_01063	0	0
BW_01065	0	0
BW_01066	1	1
BW_01068	0	0
BW_01069	0	0
BW_01070	0	0
BW_01071	0	0
BW_01072	0	0
BW_01073	0	0
BW_01074	0	0
BW_01076	0	0
BW_01077	0	0
BW_01078	0	0
BW_01079	0	0
BW_01081	0	0
BW_01082	0	0
BW_01083	0	0
BW_01084	0	0
BW_01085	1	1
BW_01086	0	0
BW_01087	0	0
BW_01088	1	0
BW_01089	1	0
BW_01091	1	1
BW_01094	1	0
BW_01095	1	1
BW_01096	0	0
BW_01097	0	1
BW_01098	0	0
BW_01099	0	1
BW_01100	1	1
BW_01102	0	0
BW_01103	0	0
BW_01104	1	0
BW_01105	0	0
BW_01106	1	0
BW_01107	0	0
BW_01108	1	1
BW_01109	1	0
BW_01111	0	0
BW_01112	0	0
BW_01113	0	0
BW_01114	0	1
BW_01115	1	1
BW_01116	0	0
BW_01117	1	1
BW_01118	1	0
BW_01119	0	0
BW_01120	0	0
BW_01121	1	0
BW_01122	0	0
BW_01123	0	0
BW_01124	0	0
BW_01125	0	0
BW_01126	0	0
BW_01128	1	1
BW_01129	0	0
BW_01130	0	0
BW_01132	0	0
BW_01133	0	0
BW_01134	1	1
BW_01135	0	0
BW_01136	0	0
BW_01137	0	0
BW_01138	0	0
BW_01139	0	0
BW_01140	1	1
BW_01141	1	1
BW_01142	0	0
BW_01143	0	1
BW_01144	0	1
BW_01146	1	1
BW_01147	1	1
BW_01148	1	1
BW_01151	0	0
BW_01152	0	0
BW_01153	0	0
BW_01154	0	0
BW_01155	0	0
BW_01156	0	0
BW_01158	0	0
BW_01159	0	0
BW_01161	0	0
BW_01162	0	0
BW_01163	0	0
BW_01164	0	0
BW_01165	0	0
BW_01166	0	0
BW_01167	0	0
BW_01168	0	0
BW_01170	1	1
BW_01171	0	0
BW_01172	0	0
BW_01175	0	0
BW_01176	0	0
BW_01177	0	0
BW_01178	0	0
BW_01179	0	0
BW_01181	1	1
BW_01182	1	1
BW_01184	0	0
BW_01185	1	1
BW_01186	0	0
BW_01189	0	0
BW_01190	0	0
BW_01192	0	0

## Sheet: T5
Supplementary Table 5: Aegilops tauschii accession code and phenotype conversions from Yildirim et al 1995
Lineage	BW code	TA code	Eye spot disease rating	Binary	Visual Score
2	BW_01079	TA1581	S	-1	4
2	BW_01130	TA1703	S	-1	3.4
2	BW_01032	TA1582	S	-1	2.5
2	BW_01033	TA1584	S	-1	3.6
2	BW_01082	TA1586	S	-1	1.6
2	BW_01083	TA1599	R	1	1.3
2	BW_01084	TA1600	R	1	1.2
2	BW_01085	TA1605	R	1	1.5
2	BW_01089	TA1615	R	1	1.2
2	BW_01091	TA1622	R	1	1.8
2	BW_01026	TA1626	R	1	1.8
2	BW_01094	TA1641	R	1	1.5
2	BW_01095	TA1642	R	1	1.5
2	BW_01096	TA1643	R	1	1.2
2	BW_01097	TA1644	R	1	2
2	BW_01098	TA1645	S	-1	2.8
2	BW_01099	TA1649	R	1	3.2
2	BW_01100	TA1651	R	1	2.2
2	BW_01102	TA1656	R	1	2
2	BW_01103	TA1658	R	1	4	*
2	BW_01104	TA1659	R	1	1.5
2	BW_01019	TA1660	S	-1	3.6
2	BW_01106	TA1662	S	-1	3
2	BW_01107	TA1664	R	1	1.3
2	BW_01108	TA1665	R	1	1
2	BW_01109	TA1666	R	1	1.3
2	BW 01110	TA1667	R	1	1.5
2	BW_01111	TA1668	R	1	1
2	BW_01112	TA1669	R	1	2
2	BW_01113	TA1670	R	1	2.9
2	BW_01115	TA1675	R	1	1
2	BW_01116	TA1677	R	1	3	*
2	BW_01117	TA1678	R	1	1
2	BW_01119	TA1680	R	1	1.5
2	BW_01120	TA1682	R	1	1.5
2	BW_01122	TA1684	R	1	2
2	BW_01123	TA1685	R	1	1.5
2	BW_01124	TA1686	R	1	1.5
2	BW_01126	TA1691	R	1	1.8
2	BW_01128	TA1695	R	1	1.8
2	BW_01129	TA1696	R	1	3.3
2	BW_23897	TA1697	S	-1	4
2	BW_01132	TA1715	S	-1	2.2
2	BW_01133	TA1718	S	-1	3.5
2	BW_01137	TA2377	R	1	1.6
2	BW_01139	TA2446	R	1	1
2	BW_01140	TA2449	R	1	1
2	BW_01001	TA2450	R	1	1
2	BW_01142	TA2452	S	-1	1.3
2	BW_01143	TA2453	R	1	2.5
2	BW_01144	TA2454	S	-1	3.9
2	BW_01146	TA2457	R	1	1.1
2	BW_01147	TA2459	R	1	1
2	BW_01148	TA2460	R	1	1.1
2	BW_01005	TA2463	R	1	1.5
2	BW_01189	TA2464	S	-1	2.8
2	BW_01151	TA2465	R	1	2
2	BW_23925	TA2468	R	1	2.6
2	BW_01154	TA2469	S	-1	4
2	BW_01155	TA2470	R	1	1.7
2	BW_01156	TA2471	R	1	2.5
2	BW_01193	TA2473	R	1	2.1
2	BW_01158	TA2474	S	-1	4
2	BW_01159	TA2475	S	-1	3.5
2	BW_01161	TA2477	R	1	2.5
2	BW_01162	TA2478	R	1	2
2	BW_01163	TA2479	S	-1	3.5
2	BW_01164	TA2480	R	1	1
2	BW_01165	TA2481	R	1	3.5
2	BW_01166	TA2483	R	1	1.5
2	BW_01168	TA2485	S	-1	4
2	BW_01170	TA2496	R	1	1
2	BW_01171	TA2497	R	1	1.6
2	BW_01172	TA2499	R	1	1.2
2	BW_01175	TA2527	R	1	1.1
2	BW_01176	TA2528	R	1	1
2	BW_01177	TA2529	R	1	1.7
2	BW_01178	TA2530	R	1	1.9
*disparity between visual score and rating

## Sheet: T6
Supplementary Table 6: O. yallundae L1 panel phenotyping isolate Y16/847
Accession	Rep 1	Rep 2	Rep 3	Rep 4
BW_01014	9	9	9	9
BW_01034	4	5	4	5
BW_01036	9	9	9	9
BW_01051	9	9	9	9
BW_01101	9	9	9	9
BW_01169	4	4	5	N/A
BW_01183	8	9	9	9
BW_23885	3	4	N/A	N/A
BW_23886	9	9	9	9
BW_23887	9	9	9	8
BW_23890	4	5	7	N/A
BW_23891	9	9	9	9
BW_23892	9	9	9	5
BW_23893	9	9	9	9
BW_23894	8	9	3	4
BW_23895	9	9	N/A	N/A
BW_23896	6	6	5	N/A
BW_23898	9	9	9	N/A
BW_23901	9	9	9	9
BW_23902	9	9	9	N/A
BW_23903	9	9	9	9
BW_23904	9	9	9	9
BW_23905	9	9	9	9
BW_23906	9	9	9	9
BW_23907	9	9	9	N/A
BW_23908	9	9	9	9
BW_23909	9	9	9	9
BW_23910	9	9	9	9
BW_23911	9	9	9	9
BW_23913	9	9	9	9
BW_23914	9	9	9	7
BW_23915	9	9	8	9
BW_23916	9	9	9	9
BW_23917	9	9	N/A	N/A
BW_23918	9	9	9	9
BW_23919	9	9	9	9
BW_23920	9	9	9	9
BW_23921	9	9	9	9
BW_23922	9	9	N/A	N/A
BW_23923	9	9	9	9
BW_23924	9	9	9	9
BW_23926	9	9	9	N/A
BW_23927	9	9	9	N/A
BW_23928	9	9	9	9
BW_23930	9	9	9	4
BW_23931	9	9	8	N/A
BW_23932	9	9	9	8
BW_23935	9	9	9	9
BW_23936	9	9	9	N/A
BW_23937	4	4	7	7
BW_23938	9	9	9	9
BW_23939	9	9	9	9
BW_23940	9	9	9	N/A
BW_23942	9	9	9	N/A
BW_23943	9	9	9	9
BW_23944	9	9	9	9
BW_23945	9	9	8	8
BW_23946	9	9	9	9
BW_23947	9	9	9	9
BW_23948	9	9	9	8
BW_23949	9	9	8	N/A
BW_23950	6	5	5	4
BW_23951	9	8	3	3
BW_23952	9	9	9	8
BW_23953	9	9	9	8
BW_23954	9	9	9	N/A
BW_23955	9	9	9	N/A
BW_23956	9	9	9	N/A
BW_23957	9	9	9	N/A
BW_23958	9	9	9	N/A
BW_23959	9	9	9	9
BW_23960	9	9	N/A	N/A
BW_23961	5	5	5	5
BW_23962	9	9	9	9
BW_23963	9	9	9	9
BW_23964	9	9	9	9
BW_23965	9	9	9	9
BW_23966	9	9	9	9
BW_23967	9	9	9	9
BW_23968	9	9	9	N/A
BW_23969	9	9	9	N/A
BW_23970	9	9	9	N/A
BW_23971	3	9	N/A	N/A
BW_23972	9	9	9	9
BW_23973	9	9	7	N/A
BW_23974	9	9	9	N/A
BW_23975	9	9	N/A	N/A
BW_23976	9	9	9	8
BW_23977	9	9	9	9
BW_23978	9	9	9	9
BW_23979	9	9	9	8
BW_23980	9	9	9	N/A
BW_23981	9	9	N/A	N/A
BW_23982	9	9	9	9
BW_23983	9	9	9	9
BW_23984	9	9	9	9
BW_23985	9	9	9	9
BW_23986	9	9	9	8
BW_23987	5	4	3	N/A
BW_23989	9	9	9	N/A
BW_23990	9	9	9	9
BW_23991	9	9	9	9
BW_23992	9	9	9	9
BW_23993	9	9	9	9
BW_23994	9	9	9	9
BW_23995	9	9	9	N/A
BW_23996	9	9	9	9
BW_23997	9	8	8	N/A
BW_23998	9	9	9	9
BW_23999	9	9	9	9
BW_26049	9	9	9	9
BW_26052	9	9	9	8
BW_26056	6	5	4	5
BW_26058	9	9	9	9
BW_26059	9	9	9	9
BW_26065	9	9	9	9
BW_26069	9	9	9	9
Chinese spring	9	9	9	9
Chinese spring	9	9	9	9
Chinese spring	9	9	9	9
Hoh 501	9	9	9	9
Robigus	9	9	8	8
VPM1	3	4	4	5
VPM1	4	5	5	4
VPM1	4	5	5	6

## Sheet: T7
Supplementary Table 7: Synthetic hexaploid wheat accessions and predicted Pch4 presence
	donors
Synthetic code	AABB	DD	(Altnernative DD name)	Pch4 Presence/ Absence
NIAB-SHW029	Sculpture-1	WX224-4-2	BW_01140	1
NIAB-SHW033	Dakter-1	WX224-4-2	BW_01140	1
NIAB-SHW035	Biensur-1	WX224-4-2	BW_01140	1
NIAB-SHW042	Hoh-506	Ent-336-1	BW_01030	-1
NIAB-SHW043	Hoh-501	Ent-088-6	BW_01079	-1
NIAB-SHW070	Hoh-506	Ent-127-8	BW_01115	1
NIAB-SHW071	Hoh-501	Ent-077-5	BW_01001	-1
NIAB-SHW072	Hoh-501	Ent-336-2	BW_01030	-1
NIAB-SHW073	Hoh-501	Ent-242-4	BW_01026	1
NIAB-SHW074	Biensur-17	Ent-336-2	BW_01030	-1
NIAB-SHW075	Hoh-501	Ent-404-1	BW_23969	-1
NIAB-SHW077	Hoh-501	Ent-402	BW_26065	-1
NIAB-SHW082	Hoh-501	Ent-090	BW_01162	-1
NIAB-SHW083	Hoh-501	Ent-087	BW_01190	-1
NIAB-SHW084	Hoh-501	Ent-084	BW_01189	-1
NIAB-SHW085	Hoh-501	Ent-389	BW_23886	-1
NIAB-SHW087	Hoh-501	Ent-382	BW_01033	-1
NIAB-SHW088	Hoh-501	Ent-080	BW_01143	-1
NIAB-SHW089	Hoh-501	Ent-086	BW_01155	-1
NIAB-SHW090	Hoh-501	Ent-102	BW_01026	1
NIAB-SHW091	Hoh-501	Ent-228	BW_01046	-1
NIAB-SHW093	Hoh-501	Ent-302	BW_26058	-1
NIAB-SHW094	Hoh-501	Ent-383	BW_01033	-1
NIAB-SHW095	Hoh-501	Ent-078	BW_01001	-1
NIAB-SHW096	Hoh-501	Ent-081	BW_01004	1
NIAB-SHW100	Hoh-501	Ent-141	BW_23959	-1
NIAB-SHW137	Hoh-501	Ent-134	BW_26052	-1
NIAB-SHW138	Hoh-501	Ent-384	BW_01082	-1
NIAB-SHW143	Hoh-501	Ent-076	BW_01140	1
NIAB-SHW144	Hoh-501	Ent-079	BW_01142	-1
NIAB-SHW145	Hoh-501	Ent-406	BW_23970	-1
NIAB-SHW147	Hoh-501	Ent-105	BW_26049	-1
NIAB-SHW148	Hoh-501	Ent-135	BW_23970	-1
NIAB-SHW149	Hoh-501	Ent-085	BW_01151	-1
NIAB-SHW150	Hoh-501	Ent-310	BW_26059	-1
NIAB-SHW151	Hoh-501	Ent-071	BW_23902	-1
NIAB-SHW152	Hoh-501	Ent-391	BW_23969	-1
NIAB-SHW153	Hoh-501	Ent-241	BW_26056	1

## Sheet: T8
Supplementary Table 8: Synthetic hexaploid wheat phenotyping
Accession	Resistance loci	Rep 1	Rep 2	Rep 3	Rep 4	Rep 5	Rep 6	Rep 7	Rep 8	Rep 9	Rep 10	Rep 11	Rep 12	Rep 13	Rep 14	Rep 15	Rep 16	Rep 17	Rep 18	Rep 19	Rep 20	Rep 21
BW_01115	Pch4	4	4	6	5	5	5	4	7	5	6	4	6	5	5	6	5	3	4	4	N/A	N/A
BW_01030	n/a	9	9	9	9	9	9	9	9	9	9	9	9	9	9	9	9	9	9	8	7	N/A
Hoh-506	n/a	9	9	9	9	9	9	9	9	9	9	9	9	9	9	9	9	9	9	9	8	N/A
SHW-070	Pch4	5	6	4	4	6	5	4	5	7	6	4	4	5	5	5	4	4	4	4	N/A	N/A
SHW-042	n/a	9	9	9	9	9	9	9	9	9	9	8	N/A	N/A	N/A	N/A	N/A	N/A	N/A	N/A	N/A	N/A
VPM1	Pch1	3	3	4	4	4	4	5	5	6	3	5	6	7	3	4	4	4	5	3	N/A	N/A
Cappelle deprez	Pch2 and QPch.jic-5A	7	6	7	6	6	8	6	7	6	N/A	N/A	N/A	N/A	N/A	N/A	N/A	N/A	N/A	N/A	N/A	N/A
Chinese Spring	n/a	9	9	9	9	9	9	9	9	9	9	9	9	9	9	9	9	9	9	9	8	8

## Sheet: T9
Supplementary Table 9. Post-hoc pairwise comparisons using Wilcoxon rank-sum tests with Benjamini-Hochberg correction for Figure 3b
	BW_01030	BW_01115	Capelle deprez	Chinese Spring	Hoh-506	SHW-042	SHW-070	VPM1
BW_01030	NA	5.95665e-08	6.16299e-06	0.97419	0.704603	0.97419	5.95665e-08	5.95665e-08
BW_01115	5.95665e-08	NA	0.000748877	5.94632e-08	5.94632e-08	7.63345e-06	0.763133	0.117798
Capelle deprez	6.16299e-06	0.000748877	NA	2.53877e-06	1.88955e-06	0.000120623	0.000461692	0.000364688
Chinese Spring	0.97419	5.94632e-08	2.53877e-06	NA	0.733939	1	5.94632e-08	5.94632e-08
Hoh-506	0.704603	5.94632e-08	1.88955e-06	0.733939	NA	0.781857	5.94632e-08	5.94632e-08
SHW-042	0.97419	7.63345e-06	0.000120623	1	0.781857	NA	7.27592e-06	7.63345e-06
SHW-070	5.95665e-08	0.763133	0.000461692	5.94632e-08	5.94632e-08	7.27592e-06	NA	0.176304
VPM1	5.95665e-08	0.117798	0.000364688	5.94632e-08	5.94632e-08	7.63345e-06	0.176304	NA

[truncated: 8 more sheets: T10, T11, T12, T13, T14, T15, T16, T17]
